# Supplementary material for: A triple action chemosensor for Cu2+ by chromogenic, Cr3+ by fluorogenic and CN− by relay recognition methods with bio-imaging of HeLa cells
Source: Royal Society of Chemistry journal article supplement (doi:10.1039/c7pp00163k), 2017-07-19
Supplement: c7pp00163k1.pdf [file c7pp00163k1.pdf]

## A triple action chemosensor for Cu<sup>2+</sup> by chromogenic, Cr<sup>3+</sup> by fluorogenic and CN<sup>-</sup> by relay recognition method with bio-imaging of HeLa cells

Natarajan Vijay,<sup>a</sup> Gopal Balamurugan,<sup>a</sup> Parthiban Venkatesan,<sup>b</sup> Shu Pao Wu<sup>b</sup> and Sivan Velmathi<sup>a,\*</sup>

<sup>a</sup>Organic and Polymer Synthesis Laboratory, Department of Chemistry, National Institute of Technology, Tiruchirappalli - 620 015, India.

<sup>b</sup>Department of Applied Chemistry, National Chiao Tung University, Hsinchu, Taiwan-300.

\*Email: velmathis@nitt.edu; svelmathi@hotmail.com

### Supporting information

Fig. S1. FT-IR spectrum of R1

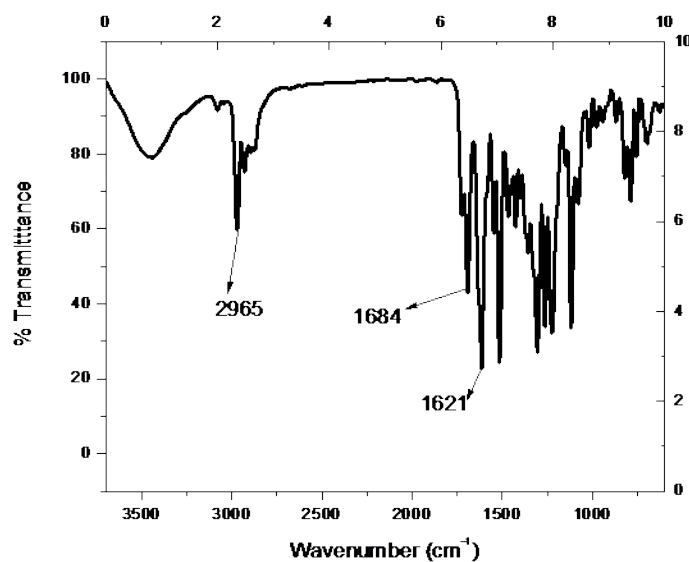

2965 (-C-H); 1684 (C=O, carbonyl); 1621 (C=N, azomethine)

Fig. S2. <sup>1</sup>H NMR spectrum of R1

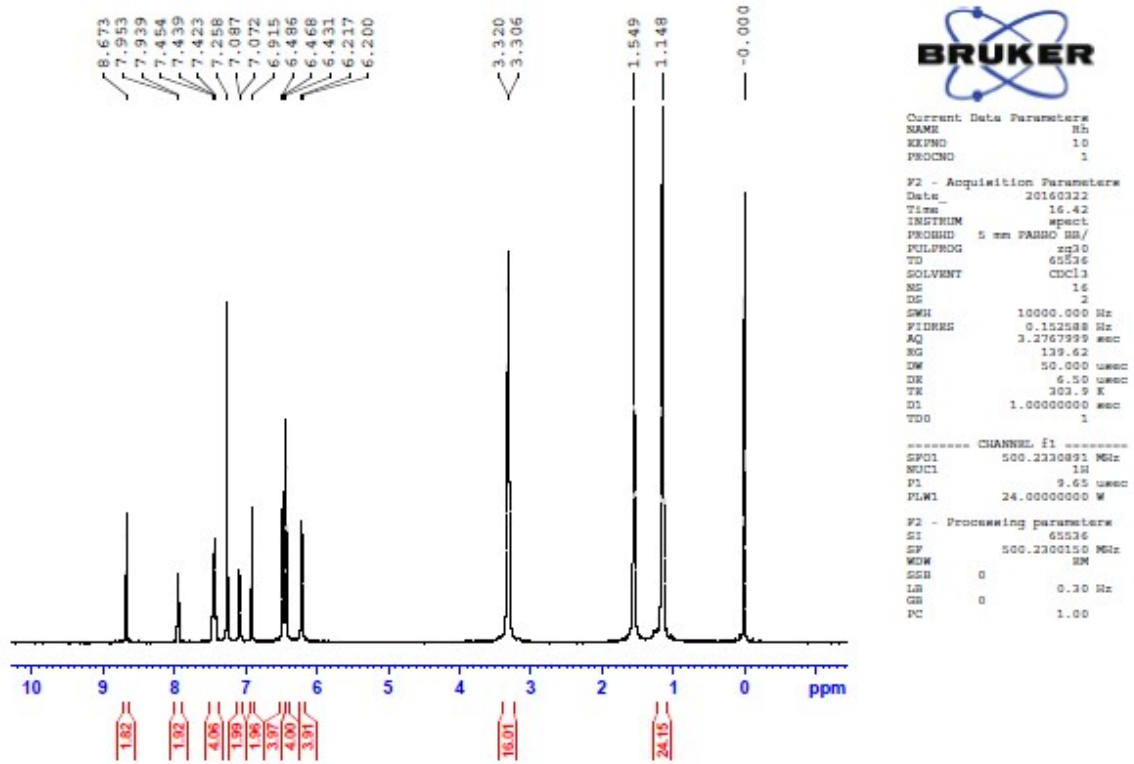

Fig. S3. <sup>1</sup>H NMR of R1 (expansion)

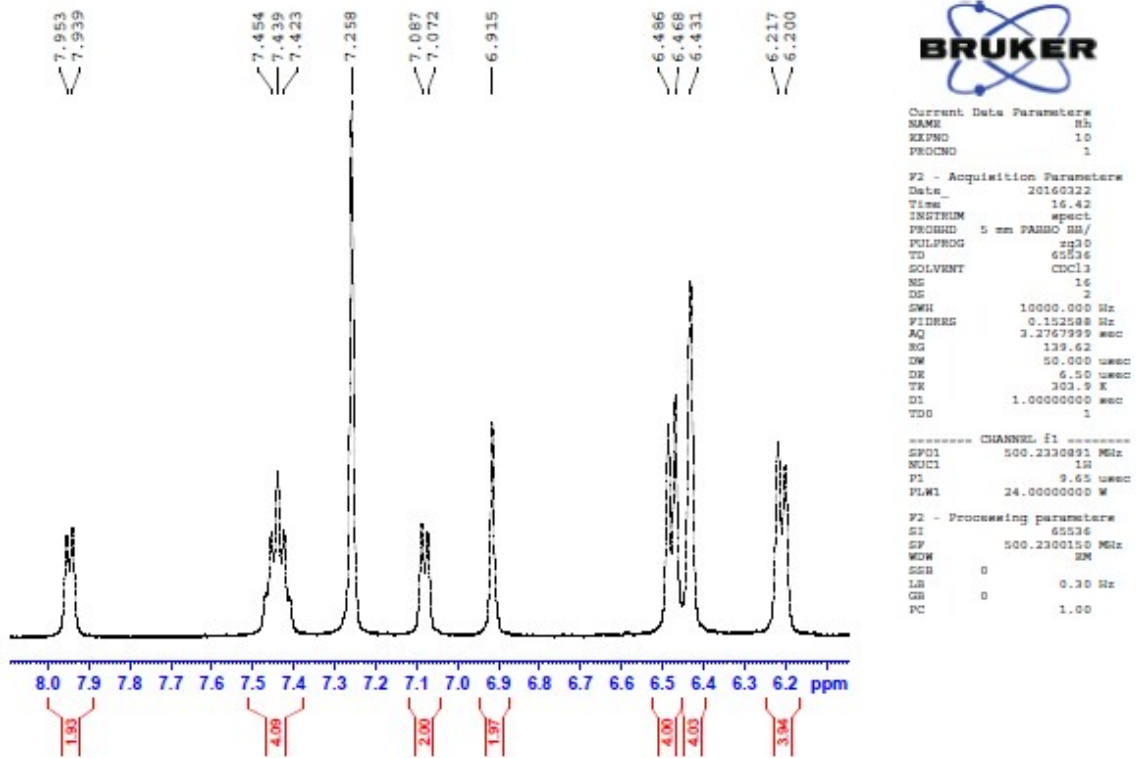

Fig. S4. <sup>13</sup>C NMR of R1

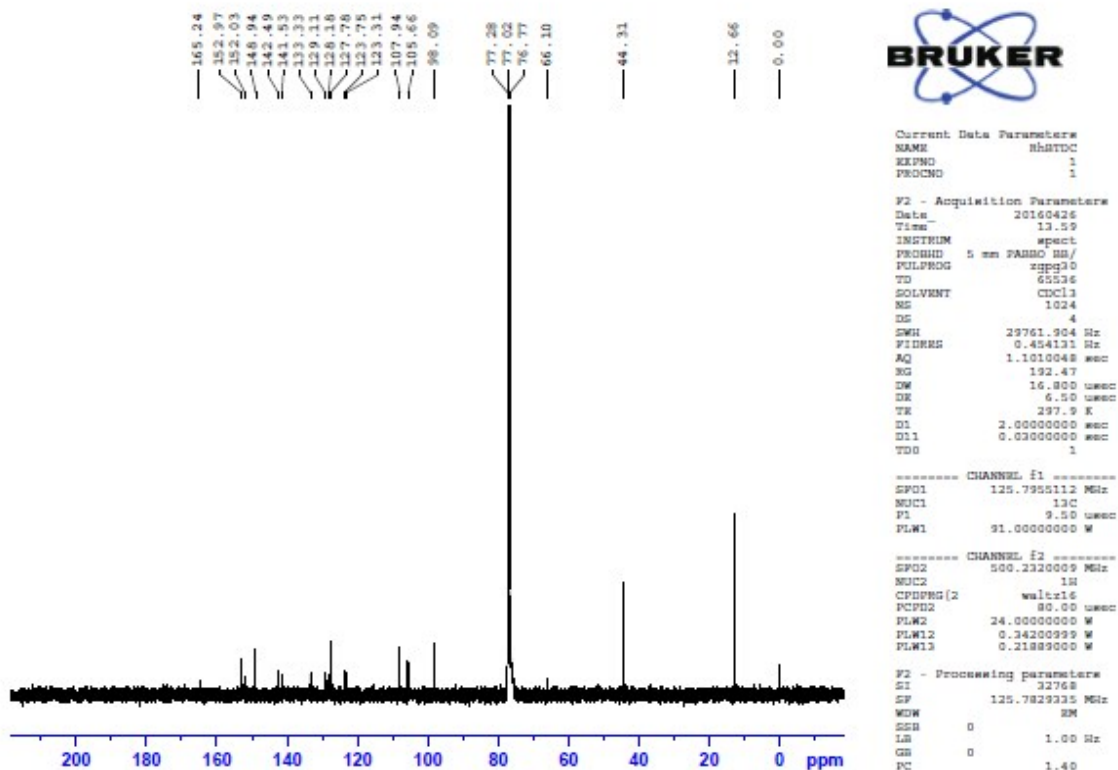

Fig. S5. HRMS of R1

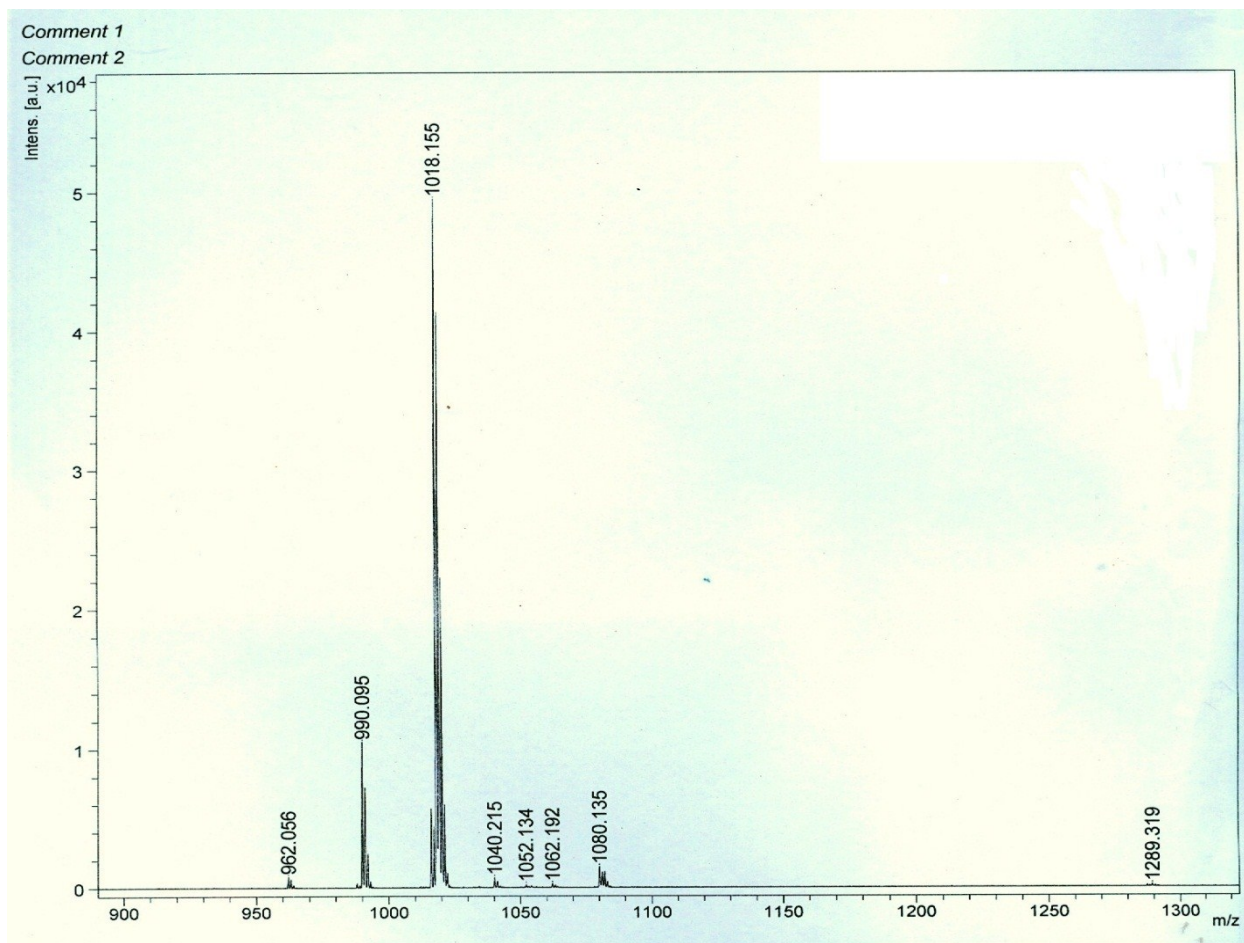

Fig. S6. Life time measurement of R1

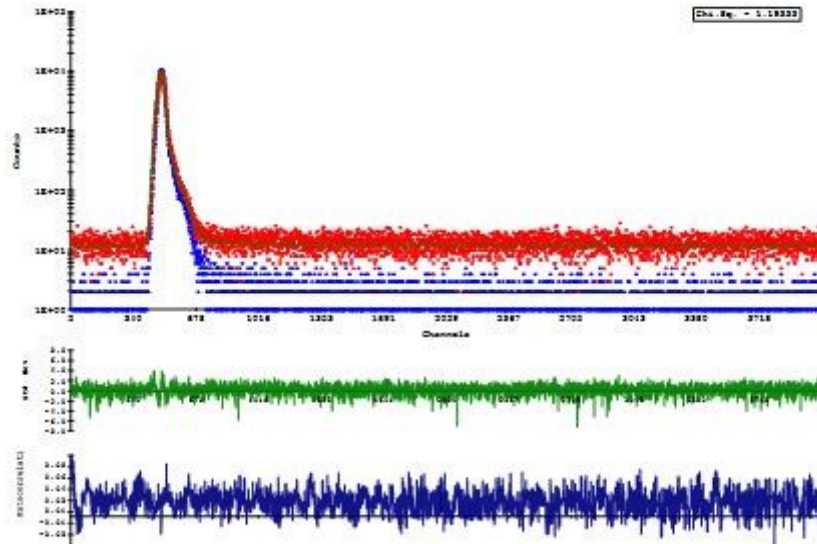

Calculated using 2 exponentials

Prompt data : Prompt  
Decay data : r12

The initial parameters are:

|                      |     |              |     |
|----------------------|-----|--------------|-----|
| Shift Value = 0      | ch; | 0            | sec |
| Shift Limit = 40     | ch; | 2.184787E-08 | sec |
| I1 Estimate = 0.0985 | ch; | 5.488834E-12 | sec |
| I2 Estimate = 0.398  | ch; | 2.155514E-11 | sec |

A Free  
B1 Free  
B2 Free

|                            |     |              |     |
|----------------------------|-----|--------------|-----|
| Prompt and decay LQ = 2    | ch; | 1.087384E-10 | sec |
| Prompt and decay M1 = 4098 | ch; | 2.247482E-07 | sec |

Background on prompt = 1.149038  
Time calibration = 5.488834E-11 sec/ch

The fitted parameters are:

M1 reduced to: 4098 ch

|                                  |                             |               |     |                      |     |
|----------------------------------|-----------------------------|---------------|-----|----------------------|-----|
| SHIFT = -3.30435                 | ch;                         | -3.02022E-10  | sec | S.Dev = 1.987784E-12 | sec |
| I1 = 3.873415                    | ch;                         | 3.112887E-10  | sec | S.Dev = 5.584205E-12 | sec |
| I2 = 40.27225                    | ch;                         | 2.21011E-08   | sec | S.Dev = 7.888782E-11 | sec |
| A = 11.88978                     |                             |               |     | S.Dev = 5.710842E-02 |     |
| B1 = 0.1888812                   | [ 85.85 Rel.Ampl]           | [ 0.89 Alpha] |     | S.Dev = 4.081218E-04 |     |
| B2 = 1.180841E-03                | [ 4.35 Rel.Ampl]            | [ 0.01 Alpha] |     | S.Dev = 2.871612E-03 |     |
| Average Life Time = 3.233892E-10 | sec                         |               |     |                      |     |
| CHI2 = 1.18333                   | [ 4049 degrees of freedom ] |               |     |                      |     |

Fig. S7. Life time measurement of R1+Cr<sup>3+</sup>

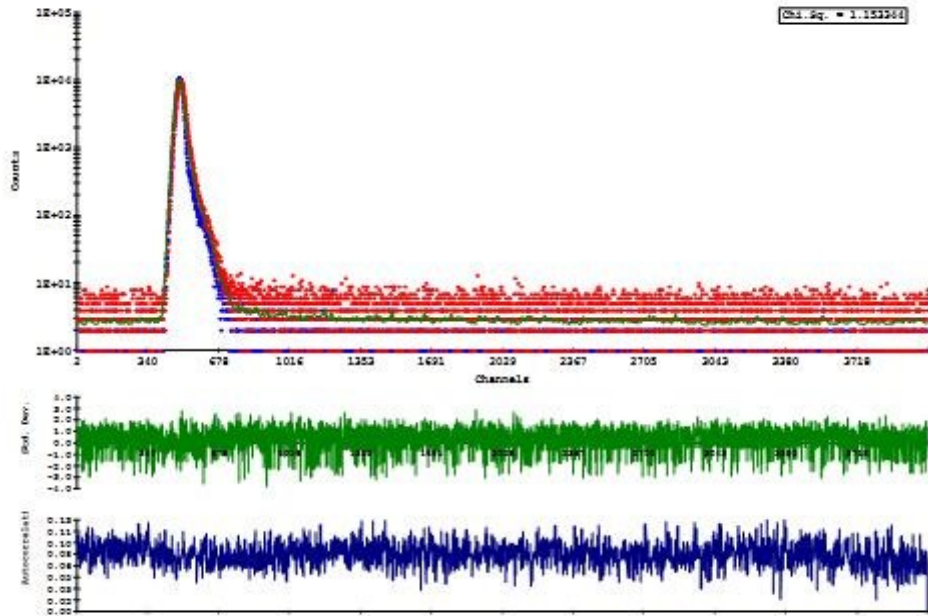

```

Calculated using 2 exponentials

Prompt data : Prompt
Decay data : r12 cr3+

The initial parameters are:

Shift Value = 0      ch;      0      sec
Shift Limit = 40    ch;      2.194787E-09  sec

T1 Estimate = 0.0995 ch;      5.459534E-12  sec
T2 Estimate = 0.395  ch;      2.155814E-11  sec

A Free
B1 Free
B2 Free

Prompt and decay LD = 2      ch;      1.097394E-10  sec
Prompt and decay HI = 4095  ch;      2.247462E-07  sec

Background on prompt = 1.149038
Time calibration = 3.458959E-11 sec/ch

The fitted parameters are:

HI reduced to: 4095 ch

SHIFT = -3.42949      ch;      -1.979555E-10  sec      5.Dev = 2.269572E-12  sec
T1 = 9.026775        ch;      4.922963E-10  sec      5.Dev = 1.572605E-11  sec
T2 = 25.70676        ch;      1.410522E-09  sec      5.Dev = 4.353465E-11  sec
A = 2.254145
B1 = 0.1128443      [ 85.27 Rel.Ampl][ 0.96 Alpha] 5.Dev = 3.508148E-04
B2 = 3.265149E-03    [ 11.73 Rel.Ampl][ 0.04 Alpha] 5.Dev = 9.53588E-03
Average Life Time = 3.380997E-10 sec
CMISQ = 1.153344      [ 4049 degrees of freedom ]
    
```

Fig. S8. Job's plot of Cr<sup>3+</sup>

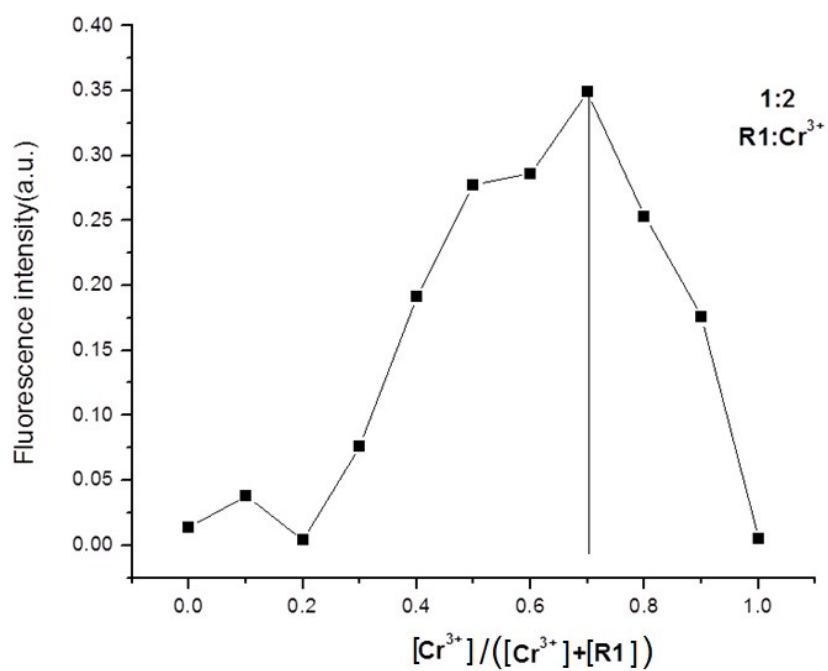

Fig. S9. Job's plot of Cu<sup>2+</sup>

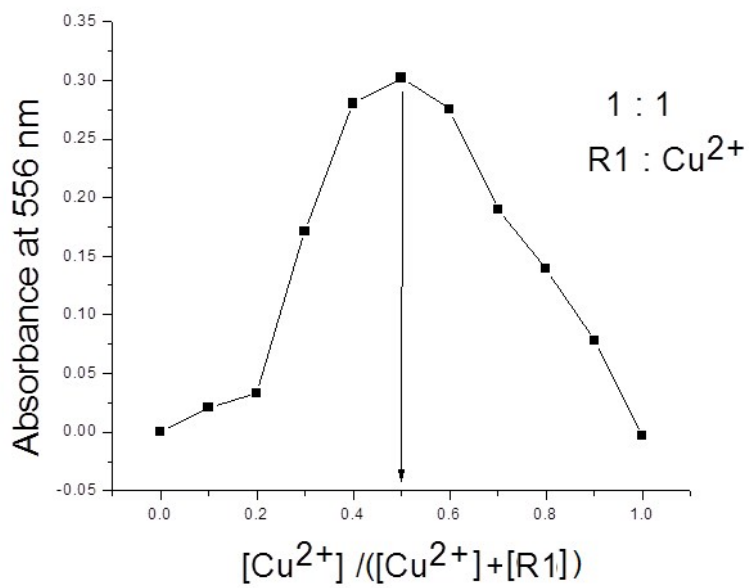



**Fig. S10.** Absorption spectrum of R1 upon incremental addition of  $\text{Cr}^{3+}$

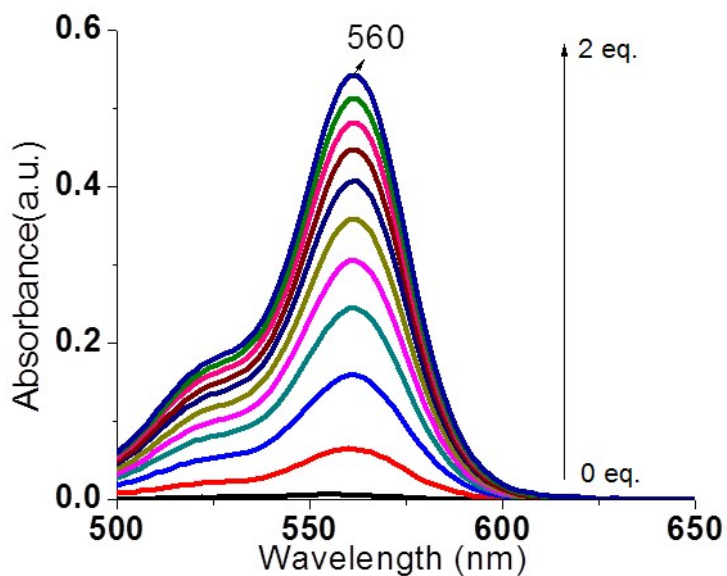

Changes in the absorption of **R1** (50 μM) in CH<sub>3</sub>CN-H<sub>2</sub>O (4:1, v/v) with increasing concentrations of  $\text{Cr}^{3+}$  in H<sub>2</sub>O (0–2 eq.).

**Fig. S11.** Absorption spectrum of R1 upon incremental addition of  $\text{Cu}^{2+}$

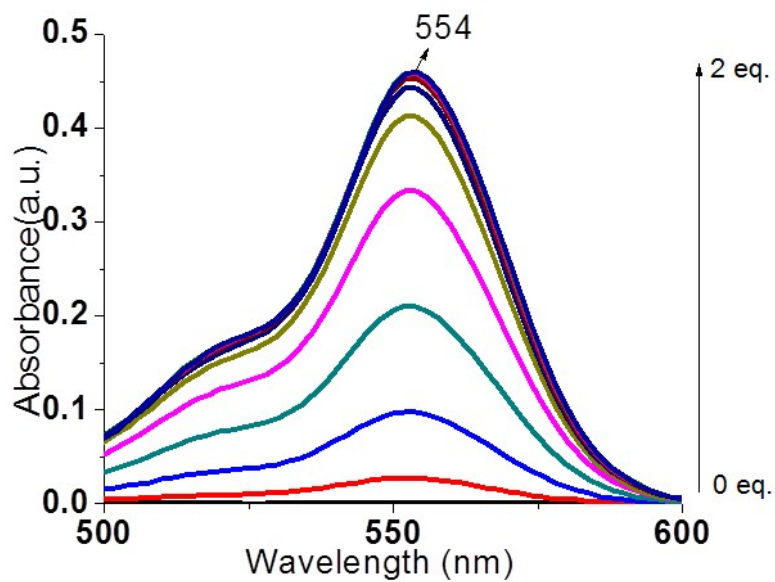

Changes in the absorption of **R1** (50 μM) in CH<sub>3</sub>CN-H<sub>2</sub>O (4:1, v/v) with increasing concentrations of  $\text{Cu}^{2+}$  in H<sub>2</sub>O (0–2 eq.).

Fig. S12. Absorption spectrum of R1 upon incremental addition of CN<sup>-</sup>

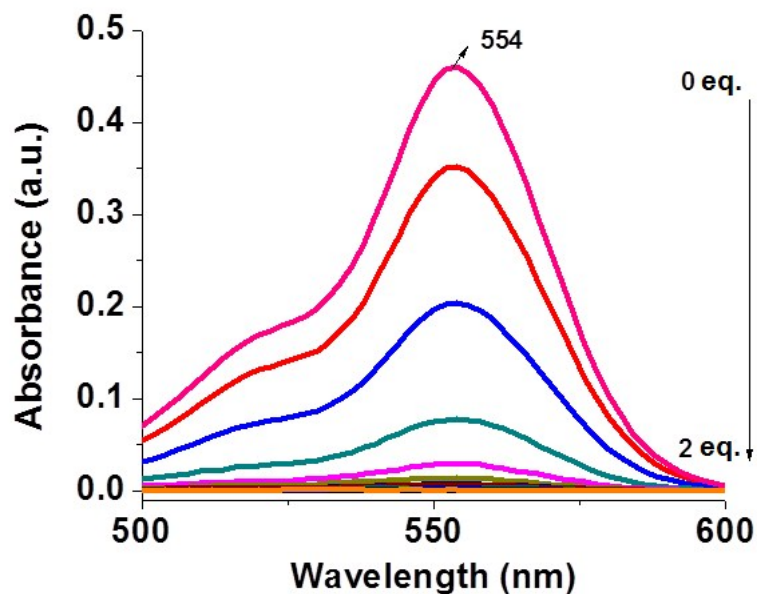

Changes in the absorption of **R1** (50  $\mu$ M) with Cu<sup>2+</sup> (2 eq.) in CH<sub>3</sub>CN-H<sub>2</sub>O (4:1, v/v) with increasing concentrations of CN<sup>-</sup> in H<sub>2</sub>O (0-2 eq.).

Fig. S13 (a) Benesi-Hildebrand plot of **R1** with Cr<sup>3+</sup> and (b) Plot of absorbance versus concentration of Cr<sup>3+</sup>

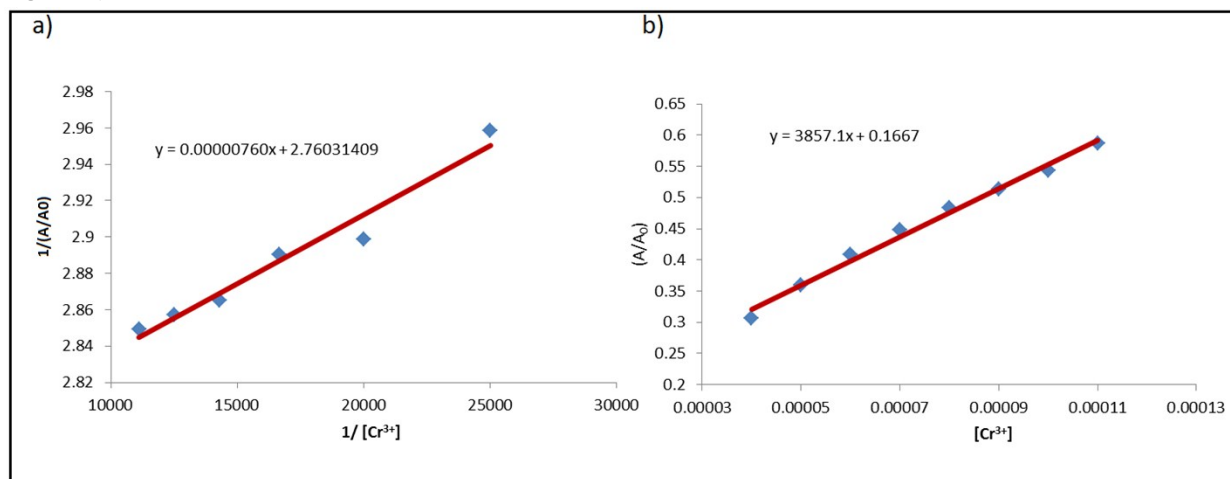

**Fig. S14. (a)** Benesi-Hildebrand plot of **R1** with  $\text{Cu}^{2+}$  and **(b)** Plot of absorbance versus concentration of  $\text{Cu}^{2+}$

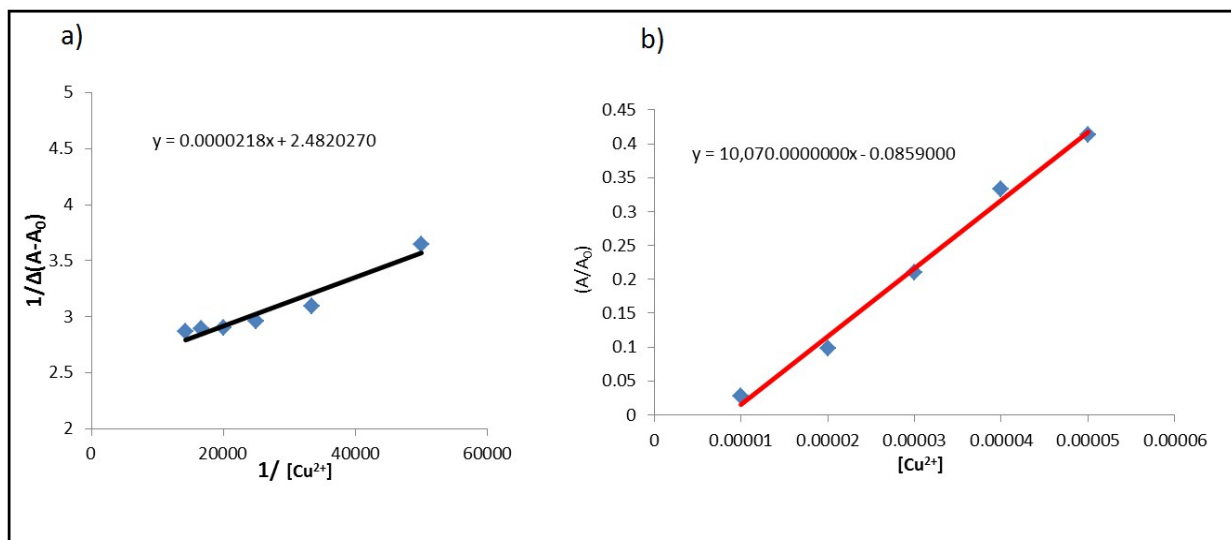

**Fig. S15. (a)** Benesi-Hildebrand plot of **R1** with  $\text{CN}^-$  and **(b)** Plot of absorbance versus concentration of  $\text{CN}^-$

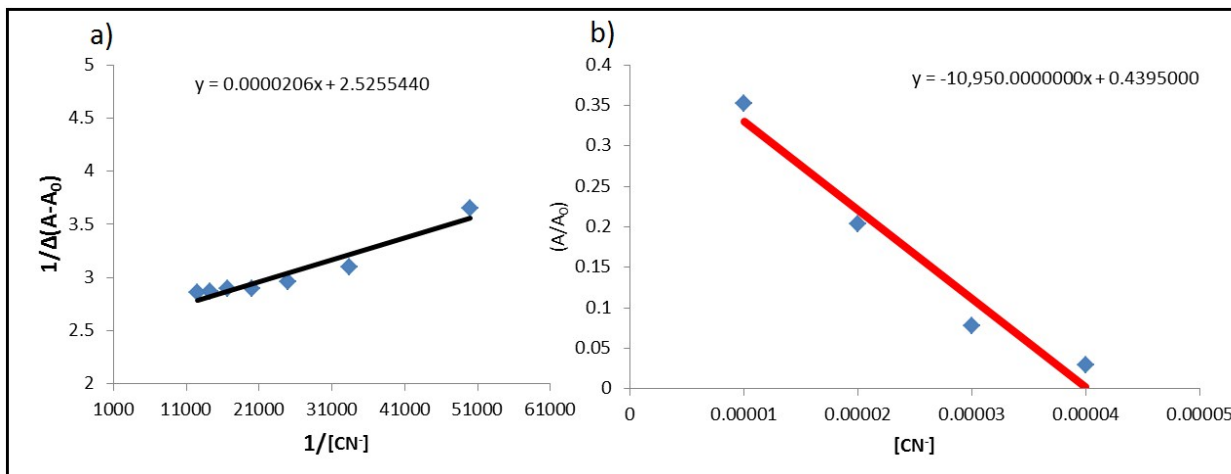

Fig. S16. ESI mass datum of R1-Cu<sup>2+</sup>complex

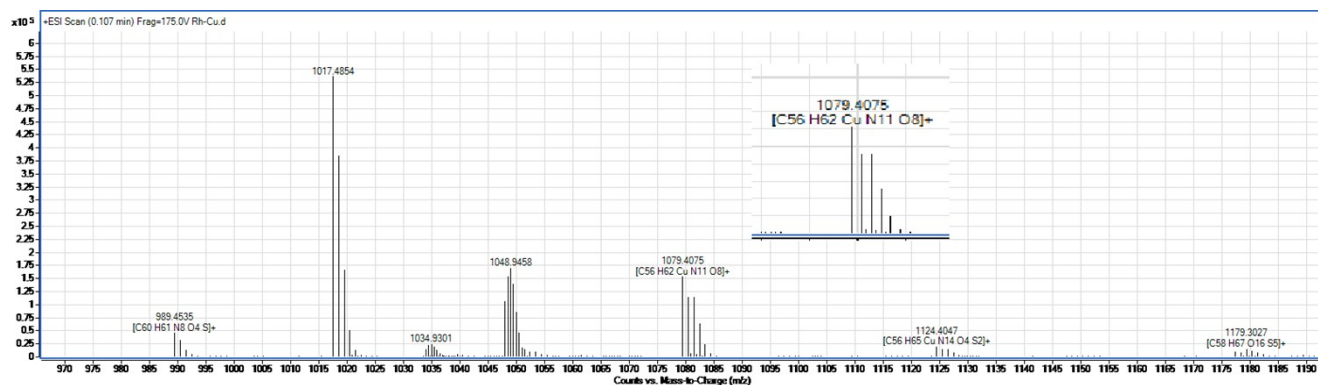

R1-Cu<sup>2+</sup>, calculated mass:1079, mass obtained:1079.4075

Fig. S17. ESI mass datum of R1-Cu<sup>2+</sup>+CN<sup>-</sup> complex

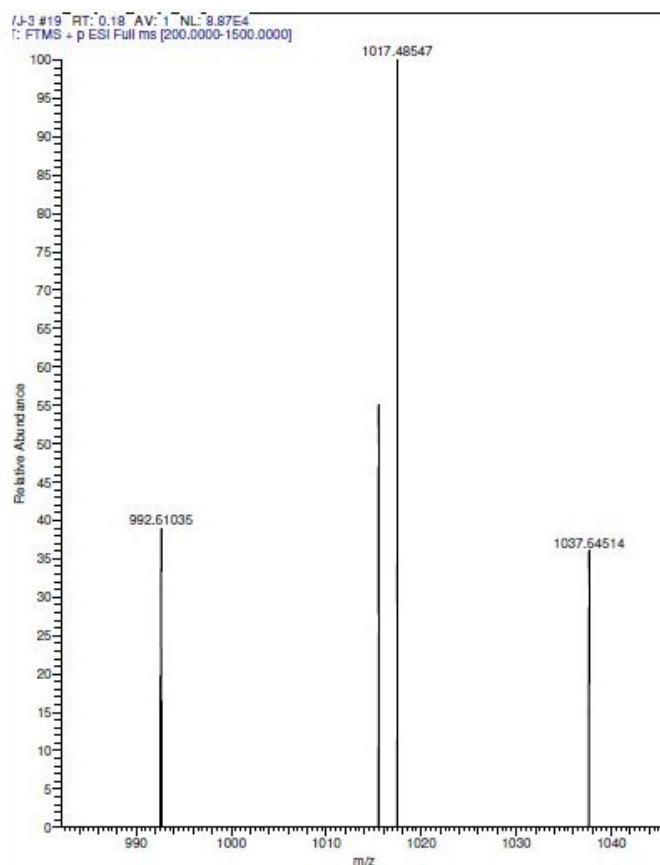

**Fig. S18.** ESI mass datum of **R1-Cr<sup>3+</sup>** complex

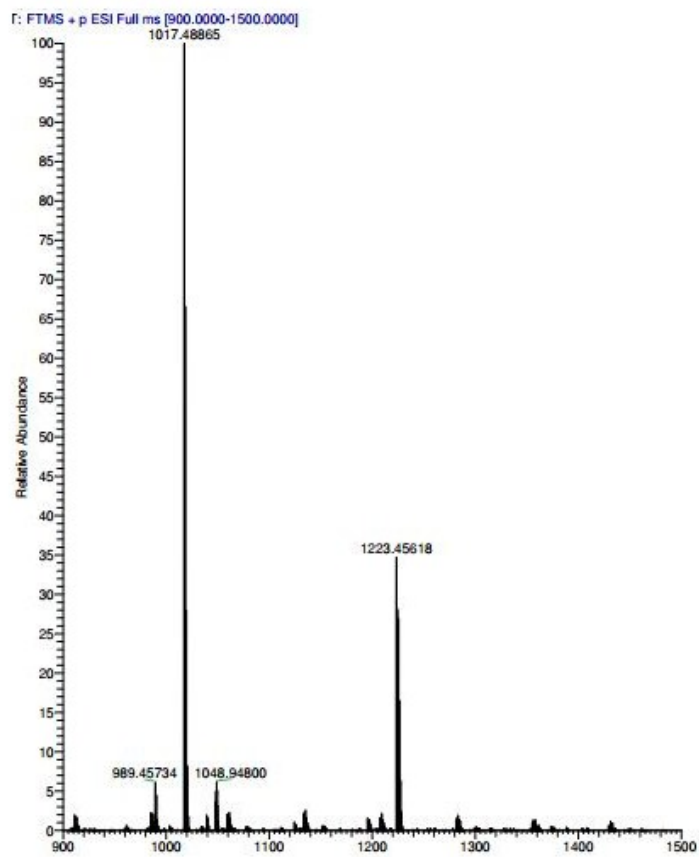

Calculated mass:1222, mass obtained:1223.45618 (m+1). Mass spectrum taken in MeOH medium.

**R1-Cr<sub>2</sub>+Cl<sub>2</sub>+MeOH** peak interpretation done according to the reference cited 53.
